# Supplementary material
Source: publisher figshare collection journal article supplement (https://gsapubs.figshare.com/articles/dataset/_/12533231)
Supplement: Supplementary file 1 [file 1]

## Sheet: Sheet1
	Area (ha)				Core (% of 1945 area)	Δ Area				Estimated recovery period (years since 1958)
Island	1945	1976	2006	2010		1945-1976 (ha)	1945-1976 (%)	1976-2010 (ha)	1976-2010 (%)
3	5.89	6.02	6.22	6.42	95.12	0.14	2.34	0.39	6.49	-
4	4.21	4.5	4.59	4.66	97.47	0.28	6.71	0.16	3.58	-
5	1.59	1.55	1.54	1.58	77.51	-0.05	-2.87	0.03	2	70
6	9.13	7.52	7.44	7.46	76.61	-1.61	-17.68	-0.05	-0.7	-
7	2.31	2.06	2.12	2.2	81.78	-0.25	-10.87	0.14	6.7	82
8	3.94	3.07	3.42	3.46	74	-0.87	-22.14	0.39	12.86	95
9	13.52	12.54	13.67	13.92	90.32	-0.98	-7.23	1.38	10.97	44
10	13.28	9.64	9.87	10.19	71.32	-3.64	-27.44	0.55	5.7	250
11	11.36	10.91	11.74	12.02	93.56	-0.45	-3.97	1.11	10.18	34
12	3.28	2.91	2.77	2.75	84.83	-0.37	-11.37	-0.16	-5.48	-
13	5.28	4.87	5.33	5.4	89.16	-0.41	-7.72	0.53	10.83	45
14	1.14	0.84	0.89	0.94	69.71	-0.31	-26.77	0.11	12.57	120
15	7.34	6.29	6.66	6.7	85.51	-1.04	-14.23	0.41	6.46	108
16	3.44	2.92	3.18	3.32	82.58	-0.52	-15.21	0.4	13.72	64
17	0.25	0.07	0.07	0.07	27.7	-0.18	-72.3	0	-0.63	-
19	1.98	1.38	1.55	1.63	69.55	-0.6	-30.11	0.25	17.72	103
20	2.09	1.78	1.83	1.89	82.12	-0.31	-14.77	0.1	5.87	121
23	1.13	1.07	1.17	1.23	76.42	-0.06	-5.53	0.17	15.62	37
24	1.87	1.82	1.91	1.98	85.66	-0.05	-2.65	0.16	8.55	34
25	2.62	2.36	2.62	2.8	86.39	-0.26	-9.97	0.44	18.45	48
26	2.35	2.43	3.83	4.02	89.32	0.07	3.12	1.59	65.68	-
27	0.4	0.26	0.23	0.24	62.1	-0.14	-36	-0.02	-7.03	-
28	7.15	5.54	6.32	6.34	76.39	-1.61	-22.52	0.81	14.58	88
29	2.73	1.79	2.13	2.13	62.86	-0.94	-34.37	0.35	19.31	113
30	12.83	5.78	7.15	7.43	45.05	-7.05	-54.95	1.65	28.52	167
31	7.99	6.18	6.99	7.23	74.75	-1.8	-22.59	1.04	16.89	78
32	3.02	2.03	2.17	2.21	67.18	-0.99	-32.78	0.18	8.85	211
33	3.75	2.47	2.83	2.93	65.81	-1.28	-34.12	0.46	18.73	115
34	10.15	8.08	8.67	8.96	79.31	-2.06	-20.34	0.87	10.8	101
35	38.62	27.77	30.8	31.53	71.39	-10.86	-28.11	3.77	13.57	119
36	3.5	2.58	3	3.02	72.79	-0.91	-26.12	0.43	16.78	92
37	3.61	2.88	3.24	3.31	78.8	-0.72	-20.03	0.43	14.79	77
38	0.76	0.52	0.51	0.53	59.35	-0.24	-31.62	0.01	1.96	843
40	1.22	0.85	0.92	0.92	61.47	-0.36	-29.69	0.07	7.77	208
41	0.76	0.09	0.22	0.22	12.19	-0.67	-87.81	0.13	134.28	205
43	8.79	8.92	9.65	9.89	94.78	0.13	1.5	0.96	10.81	-
44	60.15	53.76	57.1	57.8	88.28	-6.4	-10.63	4.05	7.53	73
45	0.88	0.6	0.75	0.79	60.24	-0.29	-32.57	0.19	32.2	70
46	23.21	22.23	22.51	22.55	94.84	-0.97	-4.19	0.31	1.42	126
47	0.13	0.06	0.09	0.09	29.83	-0.07	-53.75	0.02	39.04	122
48	21.27	20.87	21.71	21.88	96.43	-0.4	-1.87	1.01	4.84	32
49	7.29	6.86	7.39	7.46	88.63	-0.42	-5.78	0.59	8.66	43
50	42.32	41.7	43.76	44.17	94.37	-0.62	-1.47	2.47	5.91	27
51	5.6	4.72	5.12	5.2	78.49	-0.88	-15.76	0.48	10.15	82
52	7.38	6.8	7.64	7.66	91.09	-0.57	-7.79	0.85	12.57	39
53	4.47	4.12	4.44	4.49	86.78	-0.35	-7.79	0.36	8.78	52
54	1.8	1.42	1.4	1.55	74.9	-0.38	-21.1	0.13	9.42	117
55	3.77	3.54	3.76	3.79	92.98	-0.23	-6.08	0.25	7.03	50
56	3.23	3.44	3.42	3.46	97.34	0.21	6.61	0.02	0.56	-
57	6.36	6.25	6.23	6.2	95.75	-0.11	-1.76	-0.05	-0.75	-
58	18.09	17.35	18.35	18.35	90.34	-0.74	-4.07	0.99	5.73	41
59a	62.62	58.19	67.29	67.2	87.58	-4.44	-7.08	9.01	15.49	33
59b	50.73	48.63	56.22	56.31	85.86	-2.1	-4.14	7.68	15.8	27
59c	7.5	4.53	8.66	9.27	44.48	-2.97	-39.65	4.74	104.65	40
59d	13.74	13.98	14.97	14.94	97.07	0.24	1.72	0.96	6.9	-
60	4.22	4.29	4.37	4.51	85.42	0.07	1.55	0.23	5.29	-
61a	26.64	25.51	27.21	27.11	90.38	-1.14	-4.26	1.6	6.26	38
61b	4.88	3.68	5.03	4.89	71.86	-1.2	-24.6	1.21	32.86	45
61c	32.54	28.07	41.57	41.54	79.33	-4.47	-13.72	13.47	47.97	28
61d	8.65	8.58	10.66	10.88	91.63	-0.08	-0.87	2.3	26.81	19
61e	4.75	4.21	4.45	4.58	86.59	-0.54	-11.32	0.37	8.87	69
61f	14.34	13.16	16.24	17.11	82.88	-1.18	-8.23	3.95	30.05	30
61g	158.02	162.72	167.53	167.49	98.08	4.7	2.98	4.77	2.93	-
62	2.55	4.5	5.47	5.53	88.54	1.95	76.73	1.02	22.74	-
63	1.6	2.51	3.36	3.48	95.66	0.91	56.7	0.97	38.51	-
64	0.12	0.19	0.25	0.23	31.68	0.07	56.88	0.03	16.66	-
65	0.23	0.3	0.53	0.51	87.38	0.07	29.82	0.21	68.99	-
66	22.05	25.21	25.88	25.78	98.28	3.16	14.33	0.56	2.23	-
67	2.55	2.5	2.67	2.63	94.89	-0.04	-1.73	0.13	5.07	26
68	0.67	1.12	1.64	1.72	84.8	0.45	66.99	0.59	52.48	-
69	0.07	0.23	0.46	0.51	68.49	0.16	230.19	0.28	121.8	-
70	29.81	31.95	34.09	34.17	99.6	2.14	7.17	2.22	6.95	-
72	19.23	19.19	18.9	18.96	98.27	-0.04	-0.18	-0.23	-1.22	-
73	33.78	35.67	36.13	36.12	98.3	1.89	5.6	0.44	1.25	-
74	0.95	1.05	1.14	1.16	91.74	0.09	9.81	0.11	10.48	-
75	1.45	1.59	1.63	1.69	94.61	0.14	9.34	0.1	6.41	-
76	2.74	3.25	3.63	3.7	95.33	0.51	18.67	0.44	13.66	-
77	4.53	5.24	5.28	5.42	95.86	0.7	15.54	0.18	3.41	-
78	6.93	7.35	7.16	7.15	96.9	0.42	6.02	-0.2	-2.71	-
80	1.59	1.8	1.77	1.79	98.51	0.21	13.07	-0.01	-0.28	-
81	1.13	1.36	1.39	1.38	99.44	0.24	20.88	0.02	1.11	-
83	2.6	3.03	3.46	3.41	98.34	0.43	16.5	0.38	12.55	-
86	6.05	6.52	6.66	6.8	99.7	0.47	7.77	0.28	4.23	-
87	9.75	9.95	10.06	9.99	98.48	0.2	2.05	0.04	0.38	-
88	1.39	1.53	1.64	1.66	98.5	0.15	10.49	0.12	7.98	-
89	18.96	19.24	18.91	19.04	98.75	0.27	1.44	-0.2	-1.04	-
90	26.88	28.1	27.94	28.38	99.33	1.22	4.55	0.28	0.99	-
